# Supplementary material for: Immunohistochemical Evaluation of the Expression of Specific Membrane Antigens in Patients with Pancreatic Ductal Adenocarcinoma
Source: MDPI journal article supplement (doi:10.3390/cancers15184586), 2023-09-15
Supplement: s1 [file s1]

**Supplementary material Table S1.** Tumor grading and staging and antigen H-score for each patient.

| Patient | Grading | T  | N  | Staging | CA 19-9<br>H-score | MUC1<br>H-score | MUC4<br>H-score | MSLN<br>H-score | ANXA10<br>H-score | GPC1<br>H-score |
|---------|---------|----|----|---------|--------------------|-----------------|-----------------|-----------------|-------------------|-----------------|
| 1       | G2      | T2 | N1 | IIB     | 300                | 290             | 60              | 250             | 90                | 220             |
| 2       | G2      | T2 | N1 | IIB     | 300                | 280             | 190             | 110             | 195               | 20              |
| 3       | G3      | T2 | N1 | IIB     | 280                | 220             | 100             | 250             | 170               | 50              |
| 4       | G2      | T2 | N2 | III     | 300                | 180             | 30              | 270             | 100               | 20              |
| 5       | G2      | T2 | N2 | III     | 260                | 190             | 90              | 50              | 10                | 0               |
| 6       | G2      | T2 | N2 | III     | 120                | 160             | 250             | 110             | 165               | 120             |
| 7       | G2      | T2 | N1 | IIB     | 290                | 260             | 80              | 220             | 150               | 10              |
| 8       | G2      | T2 | N0 | IB      | 200                | 210             | 110             | 50              | 65                | 20              |
| 9       | G2      | T2 | N2 | III     | 200                | 175             | 70              | 25              | 170               | 10              |
| 10      | G2      | T2 | N2 | III     | 140                | 210             | 240             | 240             | 65                | 150             |
| 11      | G2      | T3 | N1 | IIB     | 280                | 260             | 15              | 150             | 170               | 10              |
| 12      | G2      | T2 | N0 | IB      | 270                | 210             | 50              | 130             | 180               | 10              |
| 13      | G2      | T2 | N0 | IB      | 290                | 290             | 190             | 165             | 240               | 50              |
| 14      | G2      | T2 | N1 | IIB     | 260                | 130             | 170             | 235             | 160               | 110             |
| 15      | G2      | T2 | N1 | IIB     | 280                | 150             | 110             | 165             | 135               | 80              |
| 16      | G2      | T1 | N0 | IA      | 300                | 290             | 10              | 150             | 100               | 40              |
| 17      | G2      | T2 | N1 | IIB     | 250                | 260             | 210             | 200             | 200               | 30              |
| 18      | G3      | T2 | N1 | IIB     | 260                | 215             | 240             | 220             | 60                | 80              |
| 19      | G3      | T3 | N2 | III     | 290                | 190             | 65              | 240             | 110               | 70              |
| 20      | G2      | T3 | N1 | IIB     | 170                | 200             | 195             | 260             | 85                | 65              |
| 21      | G2      | T2 | N2 | III     | 220                | 230             | 140             | 140             | 170               | 5               |
| 22      | G2      | T2 | N2 | III     | 300                | 230             | 165             | 170             | 115               | 140             |
| 23      | G2      | T2 | N2 | III     | 270                | 260             | 220             | 110             | 200               | 120             |
| 24      | G2      | T2 | N1 | IIB     | 270                | 220             | 160             | 110             | 265               | 70              |
| 25      | G2      | T3 | N1 | IIB     | 200                | 280             | 190             | 260             | 70                | 150             |
| 26      | G2      | T2 | N1 | IIB     | 250                | 240             | 110             | 50              | 265               | 70              |
| 27      | G2      | T2 | N2 | III     | 280                | 260             | 190             | 220             | 115               | 20              |
| 28      | G3      | T2 | N2 | III     | 25                 | 280             | 95              | 85              | 110               | 30              |
| 29      | G3      | T2 | N1 | IIB     | 280                | 300             | 40              | 0               | 10                | 290             |
| 30      | G2      | T2 | N0 | IB      | 170                | 210             | 70              | 200             | 95                | 50              |
| 31      | G2      | T1 | N0 | IA      | 140                | 215             | 215             | 175             | 70                | 190             |

|    |    |    |    |     |     |     |     |     |     |     |
|----|----|----|----|-----|-----|-----|-----|-----|-----|-----|
| 32 | G2 | T2 | N1 | IIB | 270 | 50  | 130 | 90  | 110 | 0   |
| 33 | G2 | T2 | N2 | III | 120 | 30  | 40  | 150 | 150 | 50  |
| 34 | G2 | T2 | N1 | IIB | 160 | 180 | 140 | 100 | 120 | 80  |
| 35 | G2 | T2 | N1 | IIB | 280 | 220 | 110 | 70  | 210 | 20  |
| 36 | G2 | T2 | N1 | IIB | 270 | 180 | 55  | 190 | 190 | 100 |
| 37 | G2 | T2 | N0 | IB  | 40  | 40  | 70  | 230 | 110 | 40  |
| 38 | G2 | T2 | N2 | III | 280 | 110 | 160 | 160 | 200 | 50  |
| 39 | G2 | T2 | N0 | IB  | 220 | 200 | 20  | 30  | 55  | 250 |
| 40 | G2 | T2 | N1 | IIB | 280 | 10  | 20  | 70  | 140 | 60  |
| 41 | G2 | T2 | N1 | IIB | 150 | 0   | 10  | 100 | 10  | 40  |
| 42 | G2 | T2 | N0 | IB  | 300 | 120 | 170 | 110 | 190 | 20  |
| 43 | G2 | T2 | N0 | IB  | 300 | 150 | 40  | 160 | 45  | 60  |
| 44 | G2 | T2 | N1 | IIB | 300 | 110 | 200 | 135 | 130 | 80  |
| 45 | G2 | T3 | N2 | III | 300 | 130 | 50  | 150 | 15  | 60  |
| 46 | G2 | T2 | N0 | IB  | 300 | 180 | 180 | 110 | 140 | 20  |
| 47 | G2 | T2 | N1 | IIB | 300 | 230 | 140 | 110 | 230 | 100 |
| 48 | G2 | T2 | N0 | IB  | 210 | 280 | 190 | 190 | 55  | 130 |
| 49 | G2 | T2 | N1 | IIB | 300 | 240 | 180 | 40  | 150 | 40  |
| 50 | G1 | T1 | N0 | IA  | 210 | 220 | 140 | 130 | 80  | 20  |

Abbreviations: ANXA10, Annexin A10; CA 19-9, carbohydrate antigen 19-9; GPC-1, Glypican1; MSLN, mesothelin; MUC1, mucin 1; MUC4, mucin 4.

| <b>Supplementary material Table S2.</b> Univariate and multivariate analysis to evaluate the correlation between OS and DFS and clinical-demographic and immunohistochemical factors. |                            |             |                       |             |                              |               |             |                   |               |             |
|---------------------------------------------------------------------------------------------------------------------------------------------------------------------------------------|----------------------------|-------------|-----------------------|-------------|------------------------------|---------------|-------------|-------------------|---------------|-------------|
| <b>Variable</b>                                                                                                                                                                       | <b>Univariate Analysis</b> |             |                       |             | <b>Multivariate Analysis</b> |               |             |                   |               |             |
|                                                                                                                                                                                       | <b>5-year OS (%)</b>       | <b>p</b>    | <b>5-year DFS (%)</b> | <b>p</b>    | <b>5-year OS</b>             |               |             | <b>5-year DFS</b> |               |             |
|                                                                                                                                                                                       |                            |             |                       |             | <b>OR</b>                    | <b>95% CI</b> | <b>p</b>    | <b>OR</b>         | <b>95% CI</b> | <b>p</b>    |
| Age, ≤65/>65                                                                                                                                                                          | 59.8/55.3                  | 0.81        | 56.4/46.6             | 0.72        | -                            | -             | -           | -                 | -             | -           |
| T stage, I-II/III-IV                                                                                                                                                                  | 66.7/53.5                  | 0.84        | 53.3/33.3             | 0.35        | -                            | -             | -           | -                 | -             | -           |
| N, 0-1/2-3                                                                                                                                                                            | 68.3/31.3                  | <b>0.02</b> | 62.8/26.8             | <b>0.01</b> | 2.1                          | 1.5-3.7       | <b>0.02</b> | 1.9               | 1.19-4.9      | <b>0.03</b> |
| Stage, I-II/III-IV                                                                                                                                                                    | 63/42.2                    | 0.34        | 60.6/28.6             | <b>0.04</b> | -                            | -             | -           | 2.12              | 1.45-9.9      | <b>0.02</b> |
| Neutrophils, ≤4.8/>4.8x10 <sup>9</sup> /l                                                                                                                                             | 47.8/39.5                  | <b>0.02</b> | 64.3/25.9             | <b>0.04</b> | 2.9                          | 1-7.9         | <b>0.04</b> | 2.2               | 0.98-5        | <b>0.05</b> |
| Lymphocytes, ≤1.7/>1.7x10 <sup>9</sup> /l                                                                                                                                             | 66.6/48.3                  | 0.35        | 50/51.2               | 0.92        | -                            | -             | -           | -                 | -             | -           |
| Neutrophils/Lymphocytes, ≤3.7/>3.7                                                                                                                                                    | 58.6/66.7                  | 0.88        | 41.7/66.7             | 0.46        | -                            | -             | -           | -                 | -             | -           |
| Amylase, ≤72/>72                                                                                                                                                                      | 75.1/33.9                  | <b>0.05</b> | 55.3/39.6             | 0.38        | 1.7                          | 1-7.5         | <b>0.05</b> | -                 | -             | -           |
| Lipase, ≤106/>106                                                                                                                                                                     | 56.9/61.4                  | 0.84        | 47.2/43.6             | 0.72        | -                            | -             | -           | -                 | -             | -           |
| AST, ≤175/>175                                                                                                                                                                        | 53.1/61.6                  | 0.7         | 58.2/38.1             | 0.22        | -                            | -             | -           | -                 | -             | -           |
| ALT, ≤107/>107                                                                                                                                                                        | 51.4/55.6                  | 0.77        | 48.8/49               | 0.54        | -                            | -             | -           | -                 | -             | -           |
| Phosphatase, ≤115/>115                                                                                                                                                                | 54.5/53.1                  | 0.72        | 68.2/38.3             | 0.11        | -                            | -             | -           | -                 | -             | -           |
| Gamma GT, ≤105/>105                                                                                                                                                                   | 69.7/45.3                  | 0.25        | 62.3/37.5             | 0.14        | -                            | -             | -           | -                 | -             | -           |
| Bilirubin tot, ≤2.8/>2.8                                                                                                                                                              | 65.1/44.9                  | 0.43        | 58.4/39.6             | 0.34        | -                            | -             | -           | -                 | -             | -           |
| CEA, medium ≤2.8/>2.8                                                                                                                                                                 | 59.8/50                    | 0.17        | 50.5/53.6             | 0.78        | -                            | -             | -           | -                 | -             | -           |
| CA 19-9 serum, median ≤157/>157                                                                                                                                                       | 67.1/32.1                  | <b>0.03</b> | 62.2/46.4             | 0.14        | 1.9                          | 1-5.9         | <b>0.02</b> | -                 | -             | -           |
| CA 19-9, HS median, ≤270/>270                                                                                                                                                         | 60.6/47.2                  | <b>0.05</b> | 58.7/42.5             | <b>0.05</b> | 2.7                          | 1.7-9.6       | <b>0.02</b> | 1.9               | 0.6-5.7       | 0.23        |
| CA 19-9, HS≤150/>150                                                                                                                                                                  | 83.3/58.1                  | <b>0.02</b> | 57.1/50.7             | 0.63        | 3.1                          | 1.4-7.6       | <b>0.01</b> | -                 | -             | -           |
| MUC1, HS median ≤210/>210                                                                                                                                                             | 44.5/66.8                  | 0.29        | 44.1/57.3             | 0.76        | -                            | -             | -           | -                 | -             | -           |
| MUC1, HS≤150/>150                                                                                                                                                                     | 66.7/55.7                  | 0.85        | 58.3/48.8             | 0.83        | -                            | -             | -           | -                 | -             | -           |
| Mesothelin, HS median ≤150/>150                                                                                                                                                       | 53.6/62.6                  | 0.39        | 44.6/58.2             | 0.36        | -                            | -             | -           | -                 | -             | -           |
| Mesothelin, HS≤150/>150                                                                                                                                                               | 53.6/62.6                  | 0.39        | 44.6/58.2             | 0.36        | -                            | -             | -           | -                 | -             | -           |
| MUC4, HS median ≤120/>120                                                                                                                                                             | 28.6/54.1                  | 0.65        | 49.8/52.3             | 0.81        | -                            | -             | -           | -                 | -             | -           |
| MUC4, HS≤150/>150                                                                                                                                                                     | 53.6/60.3                  | 0.59        | 49.8/52.3             | 0.81        | -                            | -             | -           | -                 | -             | -           |
| Annexin A10, HS median ≤125/>125                                                                                                                                                      | 49.2/63.1                  | 0.52        | 46.6/54.9             | 0.94        | -                            | -             | -           | -                 | -             | -           |
| Annexin A10, HS≤150/>150                                                                                                                                                              | 53.2/62.5                  | 0.56        | 48/55.6               | 0.89        | -                            | -             | -           | -                 | -             | -           |
| Glypican-1, HS median ≤50/>50                                                                                                                                                         | 63.1/52.3                  | 0.35        | 60.9/44.1             | 0.22        | -                            | -             | -           | -                 | -             | -           |
| Glypican-1, HS≤150/>150                                                                                                                                                               | 58.2/50                    | 0.54        | 51.3/50               | 0.93        | -                            | -             | -           | -                 | -             | -           |

**Supplementary material Figure S1.** Kaplan-Meier curve of overall survival (OS) according to CA 19-9 H-score (cut-off 270).

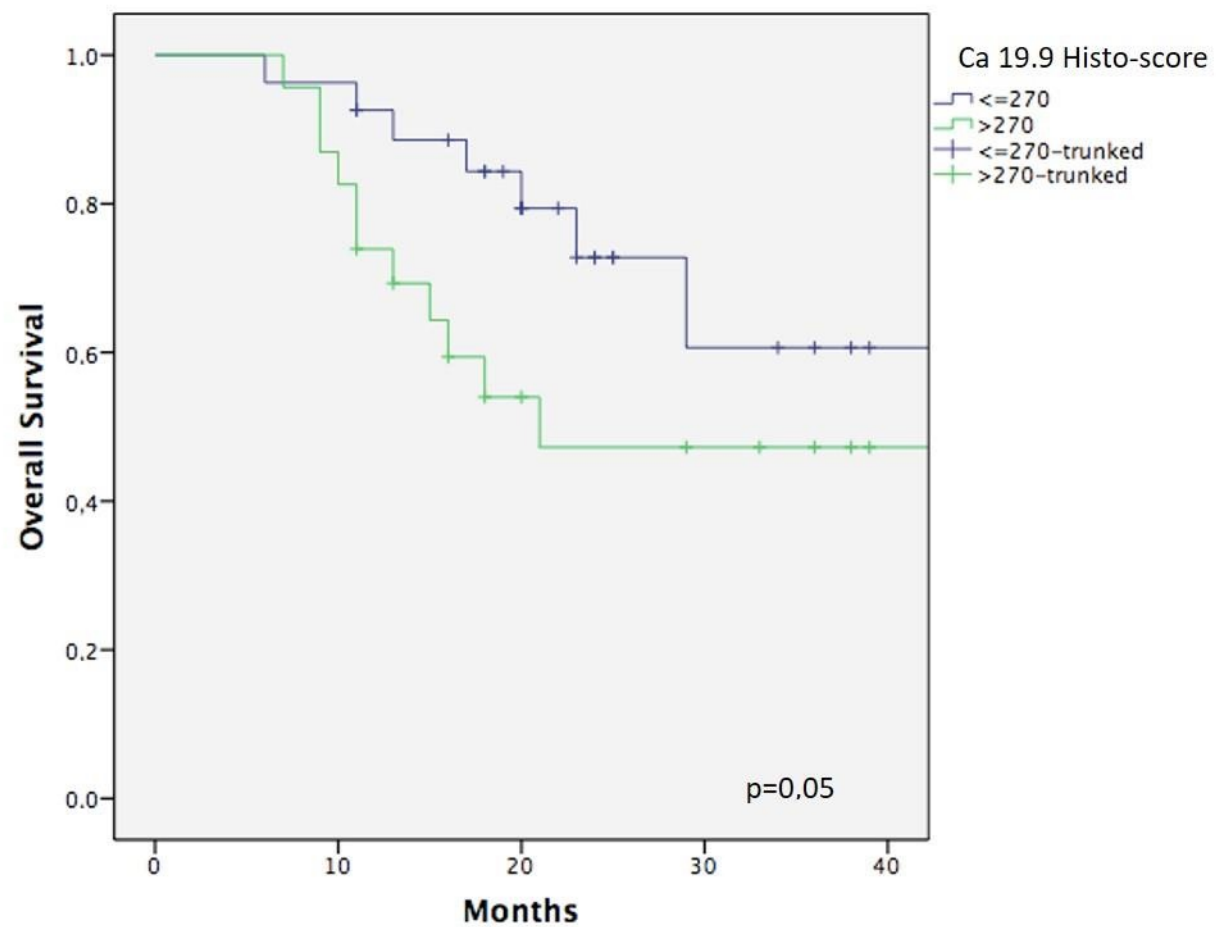

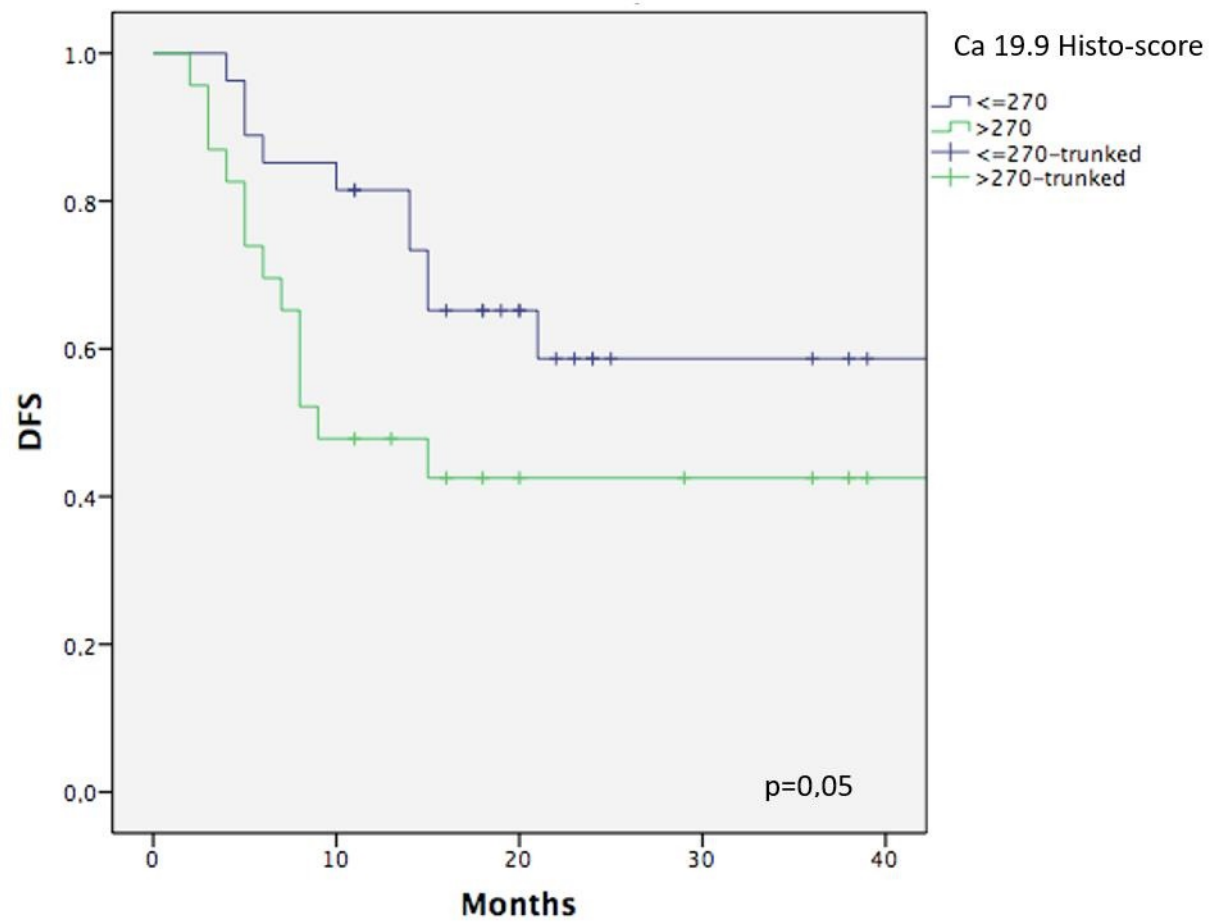

**Supplementary material Figure S2.** Kaplan-Meier curve of disease-free survival (DFS) according to CA 19-9 H-score (cut-off 270).
